# Supplementary material
Source: PubMed Central journal article supplement (PMC3056640)
Supplement: blood-2010-09-305649_1.pdf [file blood-2010-09-305649_1.pdf]

**Table S1. Association of P-Axl expression in CLL B cells with prognostic parameters**

| Patient | Rai-Stage | IgVH Mutation (M/UM) | FISH       | <sup>1</sup> ZAP70 | <sup>2</sup> CD38 | <sup>3</sup> CD49d | P-Axl Status |
|---------|-----------|----------------------|------------|--------------------|-------------------|--------------------|--------------|
| P1      | II        | M                    | 13q-       | Positive           | Negative          | Negative           | High         |
| P2      | I         | M                    | Trisomy 12 | Negative           | Negative          | Negative           | High         |
| P3      | 0         | M                    | 13q-       | Positive           | Positive          | Positive           | Negative     |
| P4      | I         | M                    | 13q-       | Negative           | Negative          | Negative           | High         |
| P5      | II        | M                    | Trisomy 12 | Negative           | Negative          | Positive           | Negative     |
| P6      | 0         | M                    | 13q-       | Negative           | Negative          | Negative           | High         |
| P7      | I         | M                    | 13q-       | Negative           | Negative          | Negative           | High         |
| P8      | II        | UM                   | Trisomy 12 | Positive           | Negative          | Positive           | High         |
| P9      | IV        | M                    | 13q-       | Positive           | Negative          | Negative           | High         |
| P10     | II        | UM                   | Trisomy 12 | Positive           | Negative          | Positive           | Notably Low  |
| P11     | 0         | M                    | Normal     | Negative           | Negative          | Negative           | High         |
| P12     | II        | UM                   | 13q-       | Positive           | Negative          | Negative           | High         |
| P13     | 0         | UM                   | Trisomy 12 | Negative           | Positive          | Positive           | High         |
| P14     | III       | M                    | Normal     | Positive           | Positive          | Negative           | Negative     |
| P15     | 0         | UM                   | 13q-       | Negative           | Negative          | Negative           | Notably Low  |
| P16     | 0         | M                    | Normal     | Negative           | Negative          | Negative           | High         |
| P17     | 0         | M                    | N/A        | Negative           | Negative          | Negative           | High         |
| P18     | II        | M                    | Normal     | Negative           | Negative          | Positive           | High         |
| P19     | II        | M                    | 17p-       | Negative           | Positive          | Positive           | Notably Low  |
| P20     | 0         | UM                   | 13q-       | Negative           | Negative          | Negative           | High         |
| P21     | I         | M                    | Trisomy 12 | Negative           | Positive          | Positive           | High         |
| P22     | I         | M                    | 13q-       | Negative           | Negative          | Negative           | Low          |

<sup>1</sup>ZAP70 is considered positive when the value is  $\geq 20\%$

<sup>2</sup>CD38 is considered positive when the value is  $\geq 30\%$

<sup>3</sup>CD49d is considered positive when the value is  $\geq 45\%$

N/A: Not available

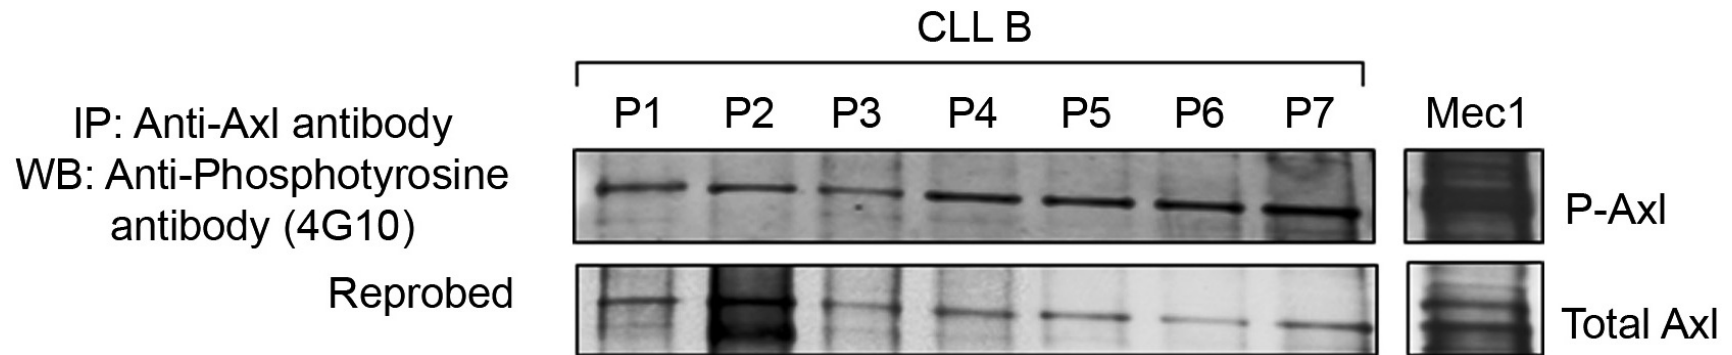

**Figure S1. Primary CLL B cells express constitutively phosphorylated Axl. CLL B-cell lysates from a number of CLL patients (n=7) which exhibited expression of P-Axl in Fig. 1A were used to immunoprecipitate total Axl using a specific antibody for Axl (cell signaling)**

Total Axl was also immunoprecipitated from Mec1 cell lysates. Phosphorylation status of Axl in the immunocomplex was examined by Western blot analysis using a phosphotyrosine antibody (Clone 4G10; Milipore). The same blot was stripped and probed for the detection of immunoprecipitated Axl using an antibody to Axl (Cell Signaling). CLL patients are indicated by numbers P1-P7.

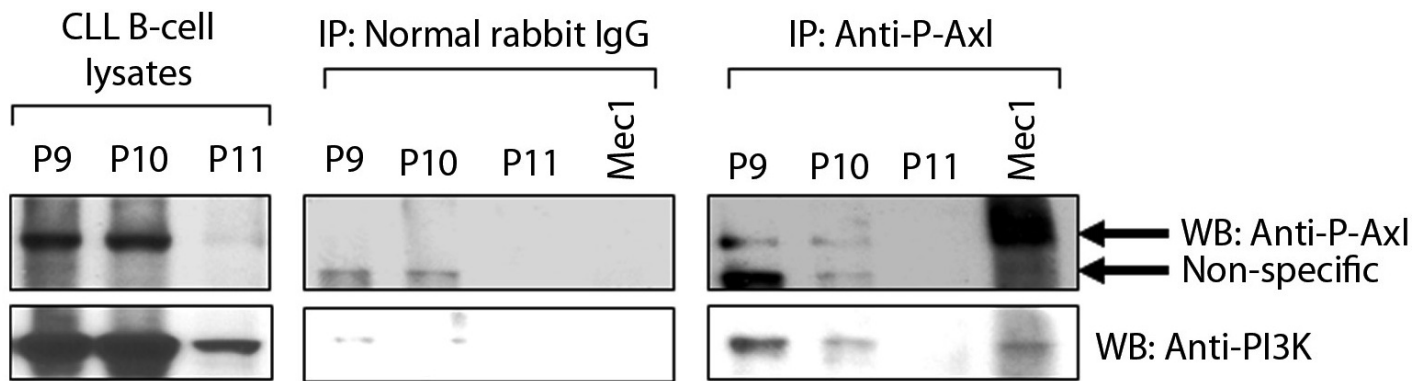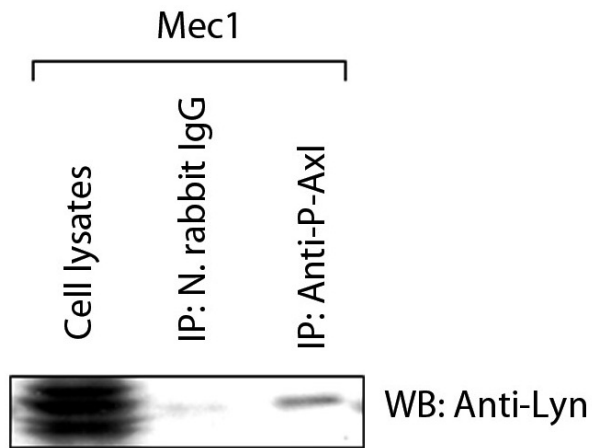

**Figure S2. Immunoprecipitation of P-Axl from CLL B-cell lysates and Mec1 cells**

Indicated CLL (P9-P11) or Mec-1 cell lysates were used to immunoprecipitate P-Axl using a specific antibody developed in rabbit to phosphorylated Axl or normal rabbit serum (Cell Signaling) as source of normal IgG control. Immunoprecipitated complex was examined for the detection of P-Axl, PI3K or Lyn. CLL cell lysates were examined for the abundance of P-Axl or PI3K (p85) by Western blot analysis. CLL patients were assigned P9, P10 and P11 as a continuation of the CLL patients' numbered from those used in Fig. 2B.

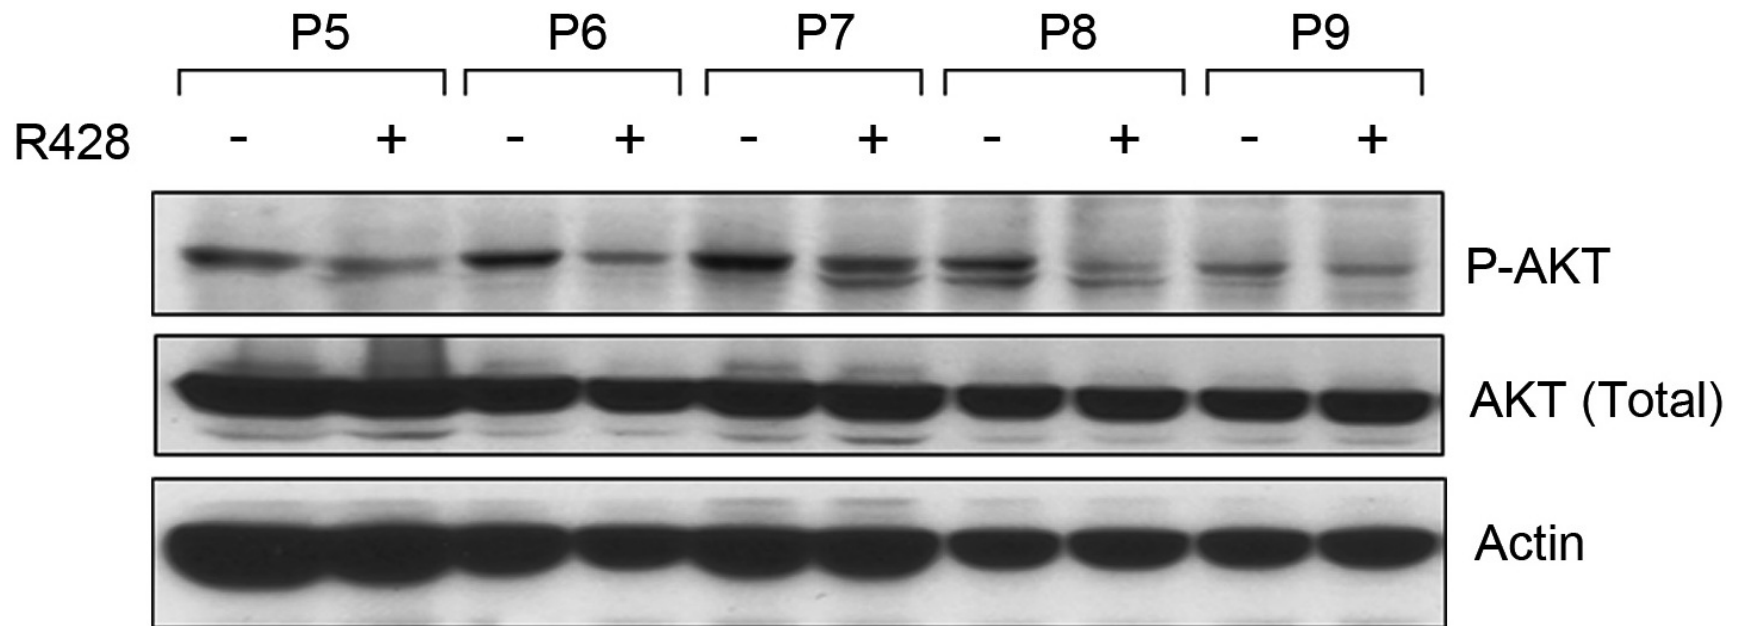

**Figure S3. Targeting Axl results in inhibition of AKT phosphorylation**

Lysates of CLL B cells (P5-P9) treated with R428 used in Figure 5B were analyzed for the status of AKT phosphorylation by Western blot using a phospho-specific (Ser473) antibody to AKT (Cell Signaling). Total AKT and actin were included as loading controls.
